# Supplementary material for: A memory and update strategy-based social group optimization for unknown parameter identification of photovoltaic modules
Source: PeerJ journal article supplement (doi:10.7717/peerj-cs.3611), 2026-02-20
Supplement: data.xlsx [file data.xlsx]

## Sheet: Sheet1
poly-crystalline		mono-crystalline
V	I	V	I
T=25℃		T=25℃
G=200W/m2		G=200W/m2
0	1.64702	0	0.691189
1.09821	1.64194	0.900099	0.689146
2.20271	1.64194	1.80076	0.687102
3.29515	1.64194	2.70378	0.685059
4.39353	1.63682	3.59705	0.683015
5.49296	1.63682	4.48808	0.680995
6.59012	1.63682	5.40087	0.678928
7.6885	1.63174	6.29414	0.676884
8.81609	1.63174	7.19996	0.674818
9.9066	1.63174	8.10298	0.672774
10.9997	1.63174	8.99388	0.670754
12.0981	1.62656	9.89453	0.668687
13.2023	1.62656	10.7864	0.666667
14.2949	1.62656	11.6833	0.662556
15.3929	1.62148	12.5923	0.660536
16.4953	1.62148	13.4889	0.654382
17.6063	1.62148	14.3858	0.646231
18.7045	1.6163	15.2826	0.629859
19.8029	1.6163	16.1917	0.601203
20.9063	1.61117	17.0886	0.54598
21.9993	1.60609	17.9855	0.439668
23.098	1.60096	18.8821	0.24128
24.1964	1.5805
25.2948	1.5448
26.4093	1.4731
27.5077	1.31964
28.606	1.02298
29.7044	0.496125
G=400W/m2		G=400W/m2
0	3.28895	0	1.38036
1.09811	3.28377	0.898285	1.37831
2.21843	3.28377	1.79029	1.37629
3.29527	3.28377	2.6929	1.37655
4.39357	3.27864	3.59551	1.37423
5.50549	3.27864	4.49436	1.37193
6.59018	3.27864	5.40743	1.36958
7.68848	3.27358	6.29246	1.36731
8.80562	3.27358	7.18796	1.36501
9.91325	3.27358	8.10089	1.36266
10.9998	3.27358	9.00001	1.36036
12.0983	3.2684	9.88156	1.35811
13.2201	3.2684	10.7864	1.35581
14.2951	3.2684	11.6936	1.3517
15.3932	3.26333	12.5923	1.34766
16.4799	3.26333	13.4889	1.34153
17.6066	3.26333	14.3858	1.33331
18.7047	3.25821	15.2826	1.31494
19.8032	3.25821	16.1917	1.28015
20.9015	3.25309	17.0886	1.21471
21.9998	3.24797	17.9855	1.08996
23.0983	3.23266	18.8821	0.860945
24.1966	3.20704
25.2951	3.15081
26.4096	3.03823
27.5079	2.82337
28.6064	2.42439
29.7047	1.76456
30.8032	0.772291
G=600W/m2		G=600W/m2
0	4.93086	0	2.06953
1.08972	4.93086	0.889915	2.06751
2.1966	4.93086	1.79113	2.06546
3.29527	4.92568	2.69262	2.06342
4.37417	4.92568	3.59021	2.06138
5.50699	4.92568	4.5058	2.05929
6.59018	4.92568	5.39641	2.05727
7.68848	4.92061	6.29065	2.05522
8.82334	4.92061	7.18838	2.05318
9.90168	4.92061	8.10033	2.05109
10.9998	4.91549	9.0088	2.04902
12.1003	4.91549	9.88533	2.04703
13.1966	4.91549	10.7864	2.04496
14.2951	4.91043	11.6734	2.04094
15.3915	4.91043	12.5923	2.03681
16.4915	4.91043	13.4889	2.02861
17.6066	4.90525	14.3858	2.01839
18.7047	4.90525	15.2826	1.99591
19.8157	4.90007	16.1917	1.95704
20.9015	4.89506	17.0886	1.87934
21.9998	4.88481	17.9855	1.73413
23.0983	4.85926	18.8821	1.4683
24.1966	4.81828	19.8065	1.01071
25.2951	4.73649	20.7041	0.31385
26.4096	4.5728
27.5079	4.27103
28.6064	3.75441
29.7047	2.94102
30.8032	1.79029
31.9015	0.306891
G=800W/m2		G=800W/m2
0	6.56771	0	2.75867
1.09811	6.56771	0.912794	2.75658
2.1966	6.56258	1.80313	2.75456
3.28893	6.56258	2.69332	2.75254
4.41242	6.56258	3.59342	2.7505
5.49169	6.56258	4.49687	2.74846
6.58738	6.55752	5.40059	2.74639
7.69165	6.55752	6.30069	2.74435
8.79592	6.55752	7.18112	2.74235
9.90168	6.55752	8.09796	2.74026
10.9998	6.55234	8.99792	2.73821
12.0897	6.55234	9.89174	2.73617
13.1966	6.55234	10.7864	2.73415
14.2951	6.54722	11.6857	2.73006
15.393	6.54722	12.5923	2.72595
16.4915	6.54722	13.4889	2.71778
17.6066	6.54209	14.3858	2.70345
18.7047	6.54209	15.2826	2.67893
19.7909	6.53703	16.1917	2.63188
20.9015	6.53191	17.0886	2.53985
21.9998	6.51654	17.9855	2.37014
23.0983	6.49093	18.8986	2.05627
24.1966	6.43469	19.8082	1.54389
25.2951	6.32729	20.7069	0.777716
26.4096	6.11249
27.5079	5.71351
28.6064	5.04344
29.7047	4.03568
30.8032	2.6956
31.9015	1.05369
G=1000W/m2		G=1000W/m2
0	8.21468	0	3.44782
1.09811	8.20962	0.896472	3.44578
2.21824	8.20962	1.8115	3.44369
3.30665	8.20962	2.69514	3.44167
4.39357	8.20962	3.58714	3.43965
5.49169	8.20444	4.49631	3.43965
6.59484	8.20444	5.40896	3.43756
7.68848	8.20444	6.28786	3.43558
8.80319	8.19943	7.20289	3.43349
9.9153	8.19943	8.09601	3.43147
11.0175	8.19943	8.99262	3.42736
12.0983	8.19943	9.88114	3.42534
13.1966	8.19425	10.7864	3.4233
14.2874	8.19425	11.6931	3.41919
15.3932	8.19425	12.5923	3.4151
16.4915	8.18919	13.4889	3.40488
17.6066	8.18919	14.3858	3.39055
18.7192	8.18395	15.2826	3.3599
19.803	8.17888	16.1917	3.30465
20.9015	8.1687	17.1091	3.19379
21.9998	8.14821	17.9972	2.99538
23.0983	8.10728	18.9079	2.63627
24.1966	8.02544	19.8121	2.06869
25.2951	7.86687	20.7172	1.22605
26.4096	7.57022	21.6126	0.116994
27.5079	7.04335
28.6064	6.21989
29.7047	5.05363
30.8032	3.56004
31.9015	1.77999
G=1000W/m2		G=1000W/m2
T=75℃		T=60℃
0	8.37337	0	3.49329
1.08791	8.37337	0.89703	3.49107
2.19668	8.37337	1.78555	3.48887
3.29502	8.36826	2.68342	3.48665
4.38144	8.36826	3.58714	3.48443
5.49169	8.36826	4.4938	3.48218
6.59022	8.36315	5.38874	3.47996
7.67515	8.36315	6.28925	3.47774
8.80309	8.36315	7.18698	3.47552
9.90143	8.35798	8.07857	3.47113
10.9998	8.35798	8.99262	3.46664
12.0981	8.35287	9.88951	3.45773
13.1816	8.34276	10.7864	3.44441
14.2948	8.33242	11.683	3.4222
15.3931	8.30687	12.5923	3.3822
16.4915	8.27109	13.4893	3.31107
17.6062	8.19941	14.3858	3.18659
18.7047	8.07667	15.2826	2.96886
19.803	7.86187	16.1917	2.60884
20.9014	7.50889	17.0886	2.05554
21.9997	6.95138	17.9852	1.2711
23.0981	6.13296	18.8821	0.240032
24.1964	5.02806	19.0541	-0.002195417
25.2947	3.63679
26.4096	1.97955
27.508	0.102347
T=50℃		T=40℃
0	8.29147	0	3.46889
1.08922	8.29147	0.898006	3.46666
2.17415	8.29147	1.79629	3.46444
3.29502	8.29147	2.68746	3.46222
4.39335	8.2863	3.58951	3.46
5.49914	8.2863	4.50622	3.45773
6.59413	8.2863	5.3932	3.45554
7.68837	8.2863	6.28995	3.45554
8.80309	8.28113	7.18684	3.45329
9.90422	8.28113	8.09573	3.44885
10.9998	8.28113	8.98704	3.44665
12.0981	8.27614	9.88951	3.44443
13.1964	8.27614	10.7863	3.43999
14.2948	8.27097	11.683	3.43108
15.3931	8.27097	12.5922	3.41996
16.4939	8.2608	13.4892	3.39775
17.6062	8.25052	14.3858	3.35778
18.7047	8.23002	15.2824	3.28222
19.803	8.18918	16.1917	3.14222
20.9014	8.1124	17.0885	2.89777
21.9997	7.96921	17.9852	2.48668
23.0981	7.71852	18.8821	1.85336
24.1964	7.29409	19.7912	0.96447
25.2947	6.62395	20.5406	-0.002144948
26.4096	5.65724
27.508	4.37332
28.6061	2.79786
29.7047	0.97177
T=25℃		T=25℃
0	8.21468	0	3.44782
1.09811	8.20962	0.896472	3.44578
2.21824	8.20962	1.8115	3.44369
3.30665	8.20962	2.69514	3.44167
4.39357	8.20962	3.58714	3.43965
5.49169	8.20444	4.49631	3.43965
6.59484	8.20444	5.40896	3.43756
7.68848	8.20444	6.28786	3.43558
8.80319	8.19943	7.20289	3.43349
9.9153	8.19943	8.09601	3.43147
11.0175	8.19943	8.99262	3.42736
12.0983	8.19943	9.88114	3.42534
13.1966	8.19425	10.7864	3.4233
14.2874	8.19425	11.6931	3.41919
15.3932	8.19425	12.5923	3.4151
16.4915	8.18919	13.4889	3.40488
17.6066	8.18919	14.3858	3.39055
18.7192	8.18395	15.2826	3.3599
19.803	8.17888	16.1917	3.30465
20.9015	8.1687	17.1091	3.19379
21.9998	8.14821	17.9972	2.99538
23.0983	8.10728	18.9079	2.63627
24.1966	8.02544	19.8121	2.06869
25.2951	7.86687	20.7172	1.22605
26.4096	7.57022	21.6126	0.116994
27.5079	7.04335
28.6064	6.21989
29.7047	5.05363
30.8032	3.56004
31.9015	1.77999
